# Supplementary material for: Branched platinum–acetylide complexes: synthesis, properties, and their aggregation behavior
Source: Royal Society of Chemistry journal article supplement (doi:10.1039/c3ra46957c), 2014-03-24
Supplement: c3ra46957c1.pdf [file c3ra46957c1.pdf]

Supplementary Material (ESI) for RSC Advances

This journal is (c) The Royal Society of Chemistry 2013

Supporting Information for

## **Branched Platinum-Acetylide Complexes: Synthesis, Properties, and Their Aggregation Behavior**

Jing Zhang,<sup>a</sup> Nai-Wei Wu,<sup>a</sup> Xing-Dong Xu,<sup>a</sup> Quan-Jie Li,<sup>b</sup> Cui-Hong Wang,<sup>a</sup>  
Hongwei Tan<sup>b</sup> and Lin Xu<sup>\*a</sup>

<sup>a</sup>Shanghai Key Laboratory of Green Chemistry and Chemical Processes, Department of Chemistry,  
East China Normal University, 3663 N. Zhongshan Road, Shanghai, 200062, P.R. China.

E-mail: [lxu@chem.ecnu.edu.cn](mailto:lxu@chem.ecnu.edu.cn)

<sup>b</sup>Department of Chemistry, Beijing Normal University, Beijing 100050, P.R. China.

### **Contents:**

1. Synthesis of **PP0** and **PT6**
2. <sup>1</sup>H, <sup>31</sup>P, <sup>13</sup>C NMR of **3**, **6**, **8**, **PT6**, **PP0**, and **PP6** in CDCl<sub>3</sub>
3. MALDI-TOF-MS spectrometry of **PT6** and **PP0**
4. Solvent-variation absorption and emission spectra
5. Concentration-variation absorption and emission spectra
6. LCSM images of the aggregates formed by **PP0** and **PT6**
7. Emission profiles of the aggregates
8. EDX results of **PP0** and **PT6**

## 1. Synthesis of PP0 and PT6

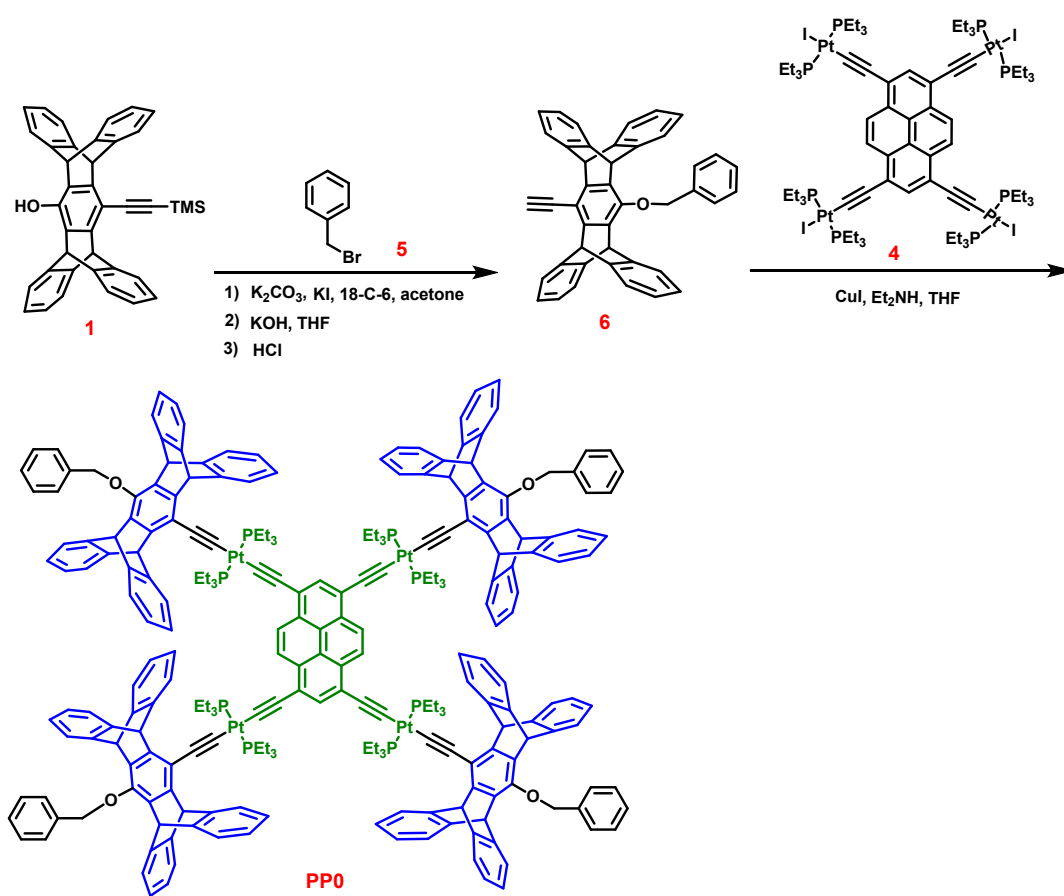

Scheme S1. Synthesis route of PP0.

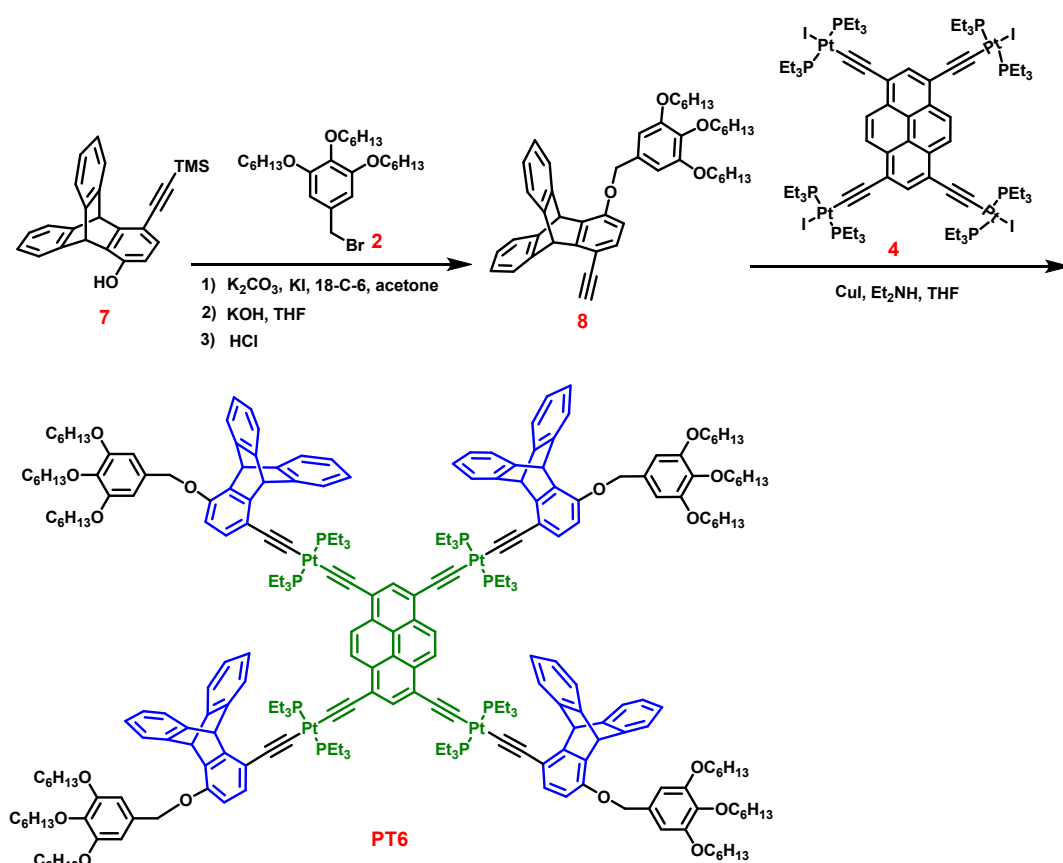

Scheme S2. Synthesis route of PT6.

**Compound 3.** A mixture of **1** (419 mg, 0.77 mmol), compound **2** (437 mg, 0.93 mmol),  $\text{K}_2\text{CO}_3$  (245 mg, 1.78 mmol), 18-C-6 (41 mg, 0.15 mmol) and KI (156 mg, 0.94 mmol) in 12 mL of dry acetone was refluxed for 120 h. The solution was cooled and the solvent was removed under reduced pressure, and the residue was dissolved in  $\text{CH}_2\text{Cl}_2$  and washed with brine. The organic layer was dried over anhydrous  $\text{MgSO}_4$ . Column chromatography with dichloromethane / petroleum (1:1) as eluent afforded the white solid of the precursor with a yield of 76.8%. Then 5 mL of dry THF was added to the precursor, and 0.5 mL solution of KOH (47 mg, 0.83 mmol) in  $\text{H}_2\text{O}/\text{CH}_3\text{OH}$  (1:1). The mixture was stirred at room temperature for 1 h. the reaction was quenched by 36.5% HCl. The solvent was removed under reduced pressure, and the residue was dissolved in  $\text{CH}_2\text{Cl}_2$ , and washed with brine. The organic layer was dried over anhydrous  $\text{MgSO}_4$ . Column chromatography with dichloromethane/petroleum (1:1) as eluent afforded the white solid of **3** with a total yield of 72.8%;  $R_f = 0.48$  (dichloromethane /petroleum ether 1:1). Mp: 69 °C.  $^1\text{H}$  NMR ( $\text{CDCl}_3$ , 300 MHz):  $\delta$  7.37-7.35 (m, 4H), 7.20-7.17 (m, 4H), 6.97-6.88 (m, 8H), 6.72 (s, 2H), 5.83 (s, 2H), 5.63 (s, 2H), 4.93 (s, 2H), 4.07-3.98 (m, 6H), 3.60 (s, 1H), 1.89-1.80 (m, 6H), 1.55-1.51 (m, 6H), 1.40-1.35 (m, 12H), 0.94-0.92 (m, 9H).  $^{13}\text{C}$  NMR ( $\text{CDCl}_3$ , 75 MHz):  $\delta$  153.43, 149.97, 146.67, 145.00, 144.78, 138.19, 135.37, 132.29, 125.16, 123.87, 123.38, 109.97, 106.29, 82.76, 79.20, 77.60, 73.46, 69.18, 52.11, 48.32, 31.77, 31.55, 30.34, 29.34, 25.80, 25.75, 22.68, 22.62, 14.10, 14.03. EI-TOF-MS of **3**,  $m/z$  calcd for  $\text{C}_{61}\text{H}_{64}\text{O}_4$ , 860.48 ( $\text{M}^+$ ), found 860.48

**Compound 6.** A mixture of **1** (297 mg, 0.55 mmol), compound **5** (78  $\mu\text{L}$ , 0.66 mmol),  $\text{K}_2\text{CO}_3$  (174 mg, 1.26 mmol), 18-C-6 (29 mg, 0.11 mmol) and KI (111 mg, 0.68 mmol) in 9 mL of dry acetone was refluxed for 43 h. The solution was cooled and the solvent was removed under reduced pressure, and the residue was dissolved in  $\text{CH}_2\text{Cl}_2$  and washed with

brine. The organic layer was dried over anhydrous  $\text{MgSO}_4$ . Column chromatography with dichloromethane / petroleum (1:1) as eluent afforded the white solid of the precursor with a yield of 85.1%. Then 4 mL of dry THF was added to the precursor, and 0.4 mL solution of KOH (261mg, 4.66 mmol) in  $\text{H}_2\text{O}/\text{CH}_3\text{OH}(1:1)$ . The mixture was stirred at room temperature for 3 h. the reaction was quenched by 36.5% HCl. The solvent was removed under reduced pressure, and the residue was dissolved in  $\text{CH}_2\text{Cl}_2$ , and washed with brine. The organic layer was dried over anhydrous  $\text{MgSO}_4$ . Column chromatography with dichloromethane/petroleum (1:1) as eluent afforded the white solid of **6** with a total yield of 73.3%;  $R_f = 0.49$  (dichloromethane /petroleum ether 1:2). Mp: 286 °C.  $^1\text{H}$  NMR ( $\text{CDCl}_3$ , 400 MHz):  $\delta$  7.64 (d,  $J=7.6$  Hz, 2H), 7.57-7.50 (m, 3H), 7.37-7.36 (m, 4H), 7.24-7.22 (m, 4H), 6.96-6.90 (m, 8H), 5.84 (s, 1H), 5.67 (s, 2H), 4.97 (s, 2H), 3.60 (s, 1H).  $^{13}\text{C}$  NMR ( $\text{CDCl}_3$ , 100 MHz):  $\delta$  149.87, 146.73, 145.04, 144.81, 137.29, 135.38, 128.92, 128.46, 127.92, 125.23, 123.93, 123.44, 110.09, 82.71, 79.24, 77.50, 52.14, 48.24. EI-TOF-MS of **6**,  $m/z$  calcd for  $\text{C}_{43}\text{H}_{28}\text{O}$ , 560.21 ( $\text{M}^+$ ), found 560.21

**Compound 8.** A mixture of **7** (300 mg, 0.819 mmol), compound **2** (386 mg, 0.819 mmol),  $\text{K}_2\text{CO}_3$  (260 mg, 1.883 mmol), 18-C-6 (43 mg, 0.164 mmol) and KI (169 mg, 0.999 mmol) in 13 mL of dry acetone was refluxed for 65 h. The solution was cooled and the solvent was removed under reduced pressure, and the residue was dissolved in  $\text{CH}_2\text{Cl}_2$  and washed with brine. The organic layer was dried over anhydrous  $\text{MgSO}_4$ . Column chromatography with dichloromethane/petroleum (1:2) as eluent afforded the white solid of the precursor with a yield of 59.2%. Then 5 mL of dry THF was added to the precursor, and 0.5 mL solution of KOH (272 mg, 4.847 mmol) in  $\text{H}_2\text{O}/\text{CH}_3\text{OH}(1:1)$ . The mixture was stirred at room temperature for 2 h. the reaction was quenched by 36.5% HCl. The solvent was removed under reduced pressure, and the residue was dissolved in  $\text{CH}_2\text{Cl}_2$ , and washed with brine. The organic layer was dried over anhydrous  $\text{MgSO}_4$ . Column chromatography with dichloromethane/petroleum (1:1) as eluent afforded the white solid of **8** with a total yield of 49.4 %;  $R_f = 0.48$  (dichloromethane /petroleum ether 1:1). Mp: 71 °C.  $^1\text{H}$  NMR ( $\text{CDCl}_3$ , 400 MHz):  $\delta$  7.44-7.43 (m, 2H), 7.38-7.36 (m, 2H), 7.08 (d,  $J=9.2$  Hz, 1H), 7.00-6.99 (m, 4H), 6.60 (s, 2H), 6.54 (d,  $J=8.0$  Hz, 1H), 5.94 (s, 1H), 5.91 (s, 1H), 5.00(s, 2H), 3.99-3.94 (m, 6H), 3.27 (s, 1H), 1.81-1.77 (m, 6H), 1.48-1.33 (m, 18H), 0.92-0.91 (m, 9H).  $^{13}\text{C}$  NMR ( $\text{CDCl}_3$ , 100 MHz):  $\delta$  153.89, 153.26, 149.86, 145.13, 137.95, 134.02, 131.84, 130.06, 125.16, 124.06, 123.60, 110.39, 109.95, 105.82, 81.53, 78.89, 73.43, 70.64, 69.13, 52.11, 47.09, 31.76, 31.58, 30.28, 29.33, 25.75, 22.67, 22.61, 14.06, 14.01. EI-TOF-MS of **8**,  $m/z$  calcd for  $\text{C}_{47}\text{H}_{56}\text{O}_4$ , 684.42 ( $\text{M}^+$ ), found 684.42

## 2. $^1\text{H}$ , $^{31}\text{P}$ , $^{13}\text{C}$ NMR of **3**, **6**, **8**, **PT6**, **PP0**, and **PP6** in $\text{CDCl}_3$

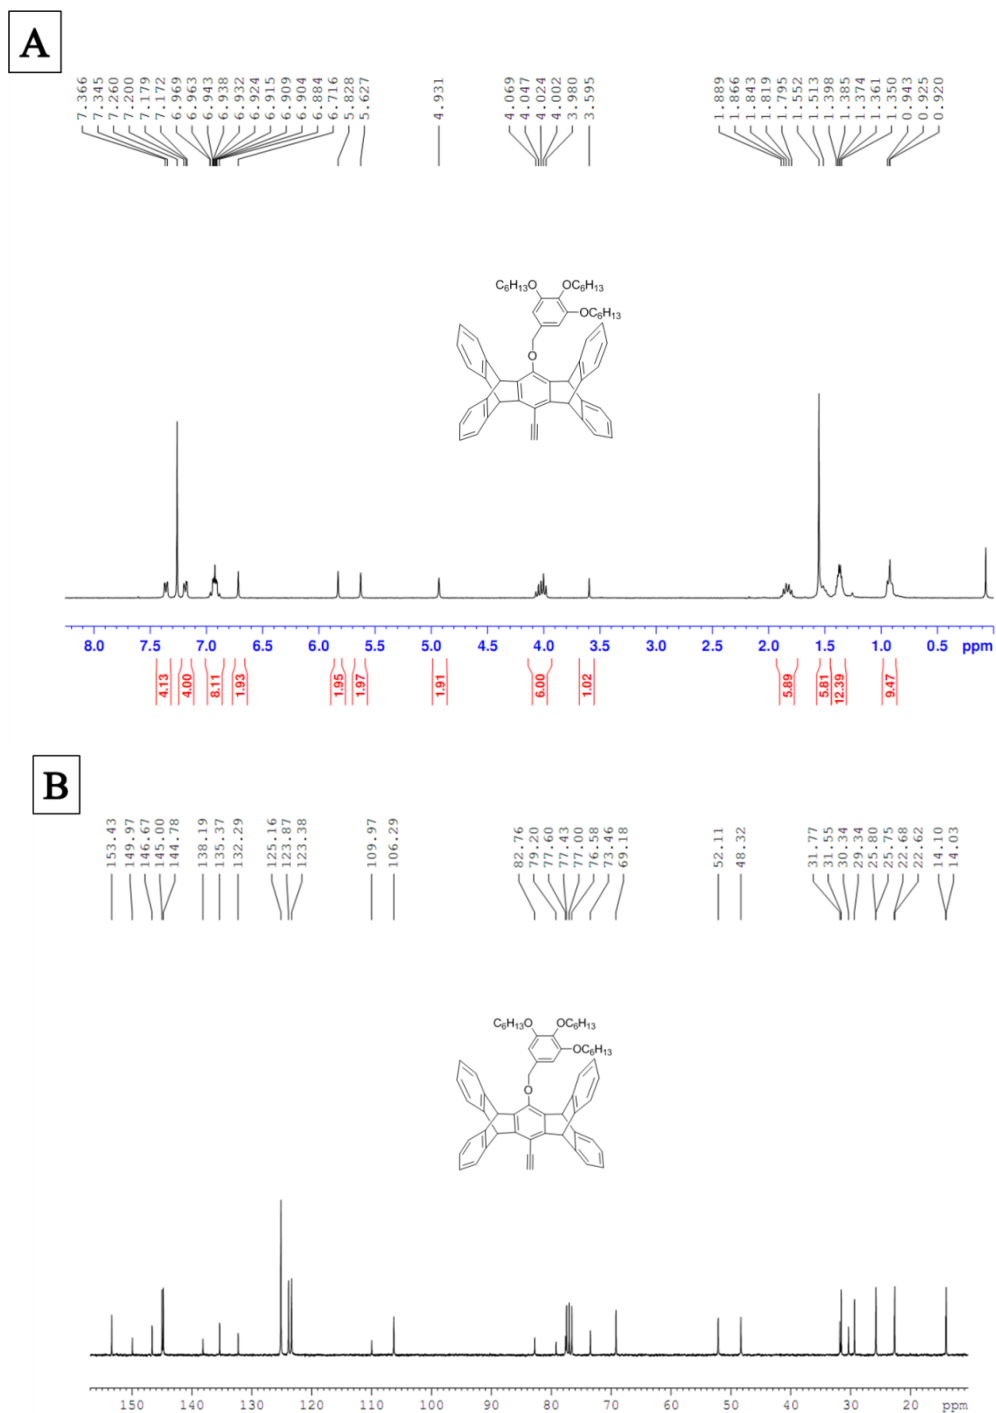

**Figure S1.**  $^1\text{H}$  (A),  $^{13}\text{C}$  (B) NMR of compound **3** in  $\text{CDCl}_3$ .

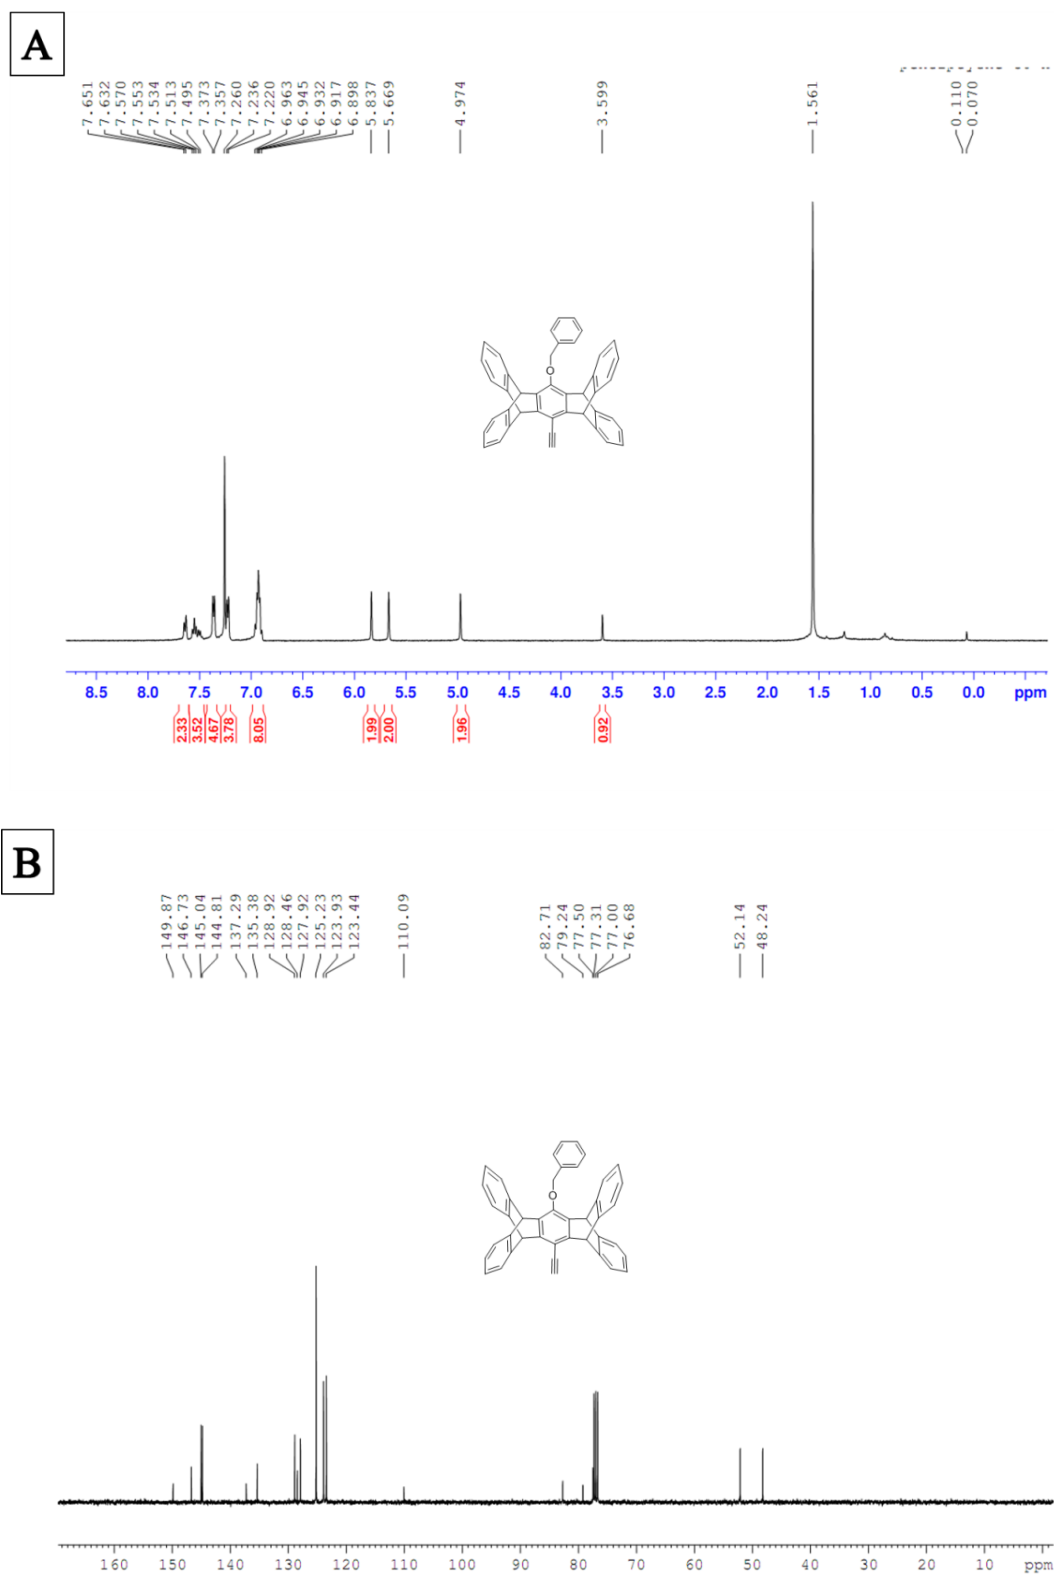

Figure S2. <sup>1</sup>H (A), <sup>13</sup>C (B) NMR of compound 6 in CDCl<sub>3</sub>.

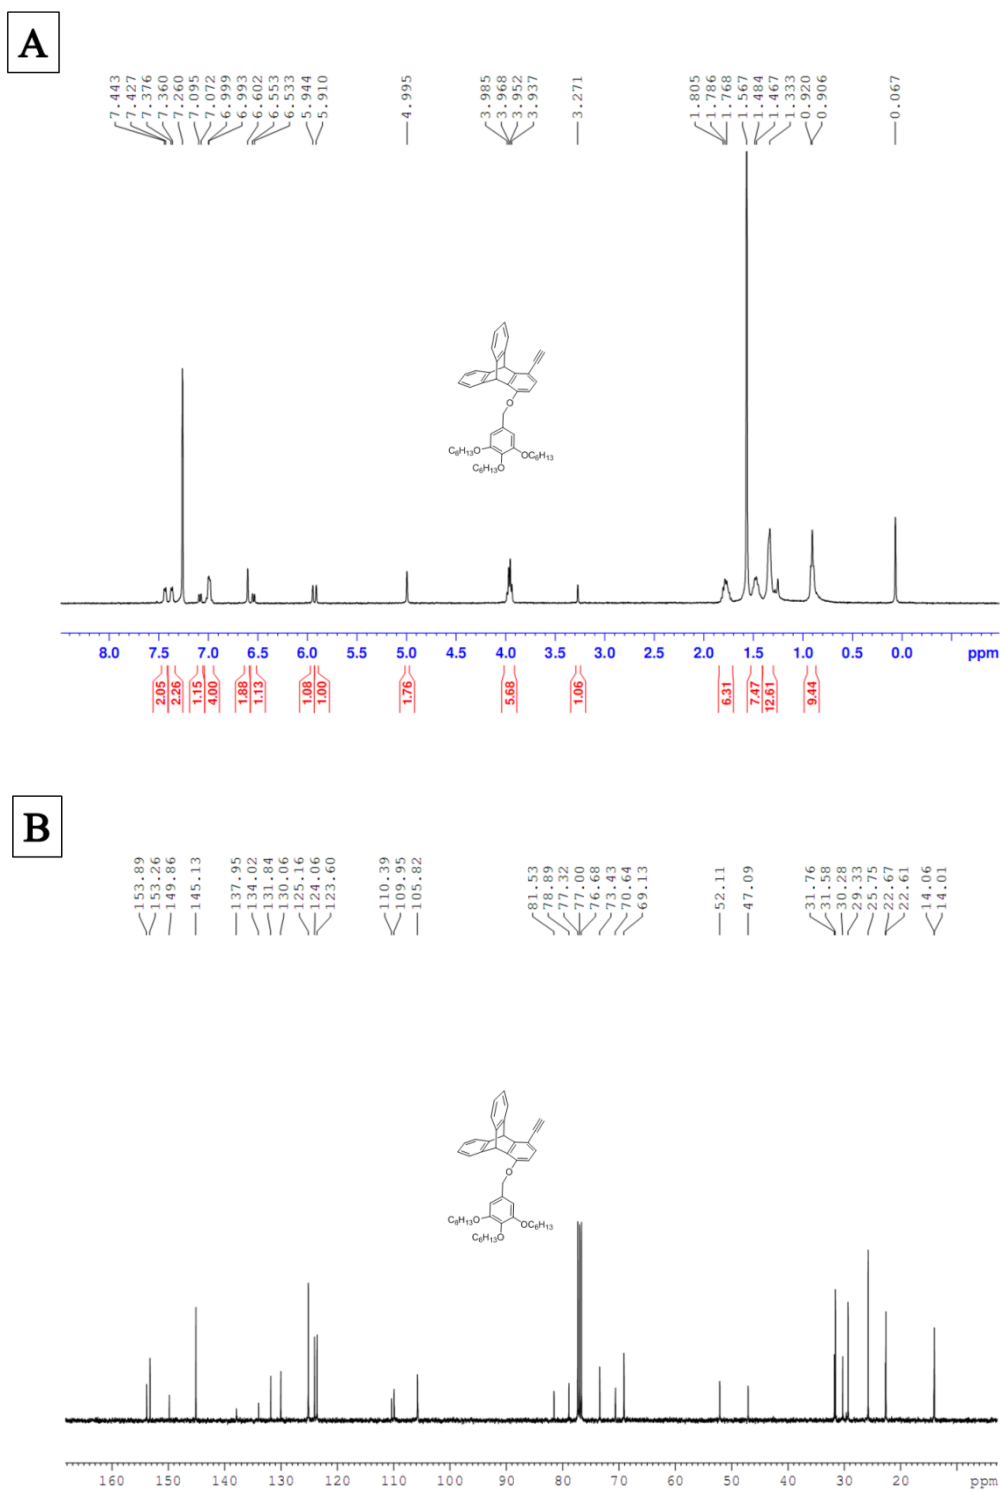

Figure S3. <sup>1</sup>H (A), <sup>13</sup>C (B) NMR of compound **8** in CDCl<sub>3</sub>.

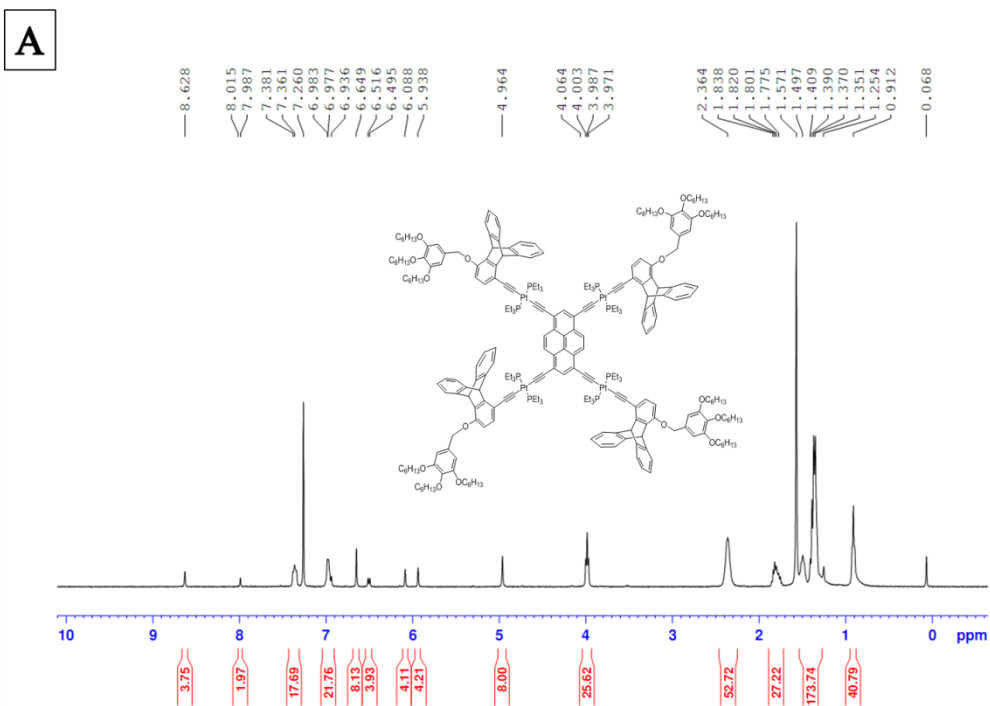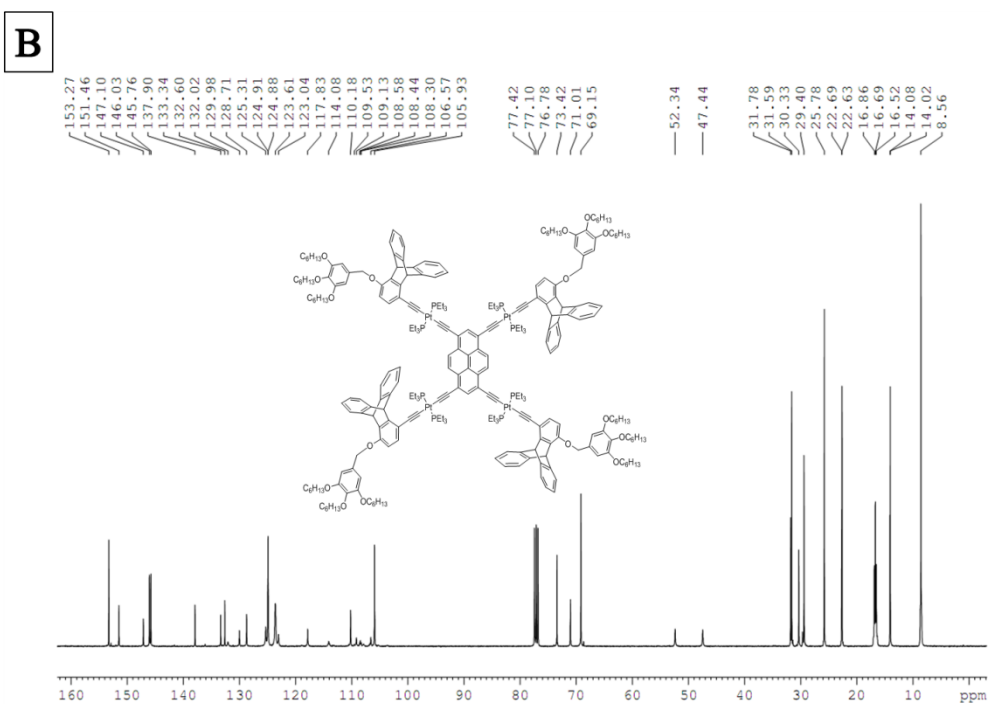

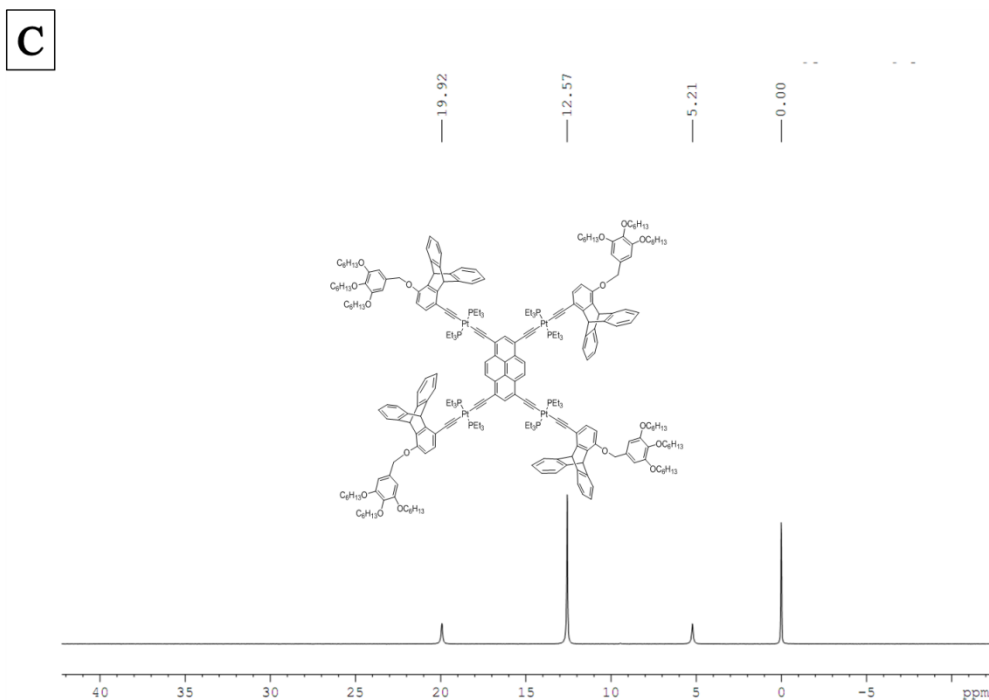

**Figure S4.**  $^1\text{H}$  (A),  $^{13}\text{C}$  (B) and  $^{31}\text{P}$ (C) NMR of compound **PT6** in  $\text{CDCl}_3$ .

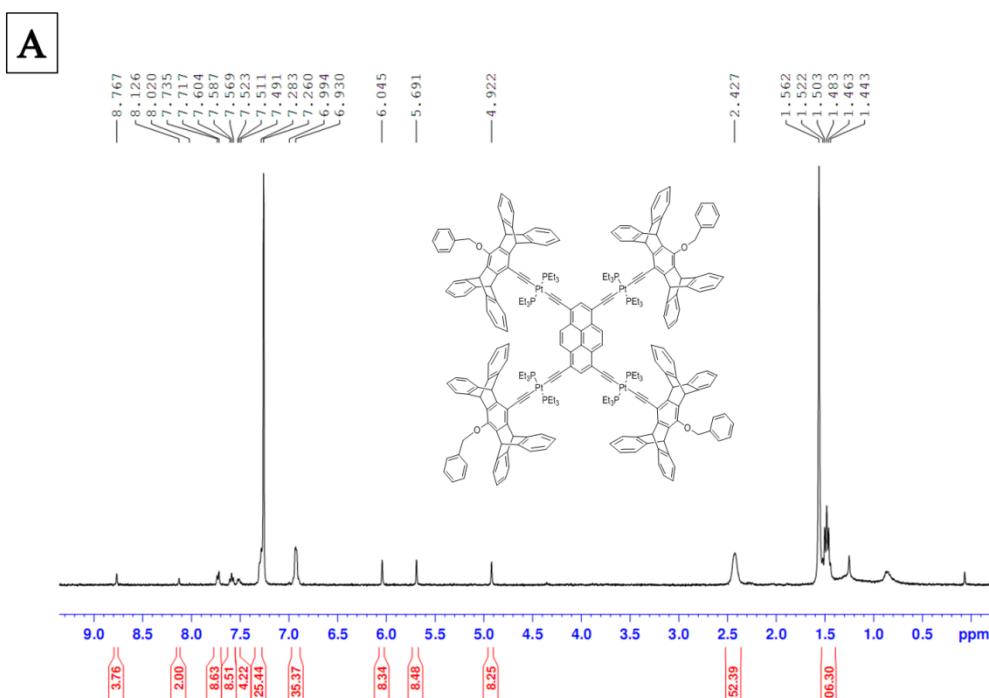

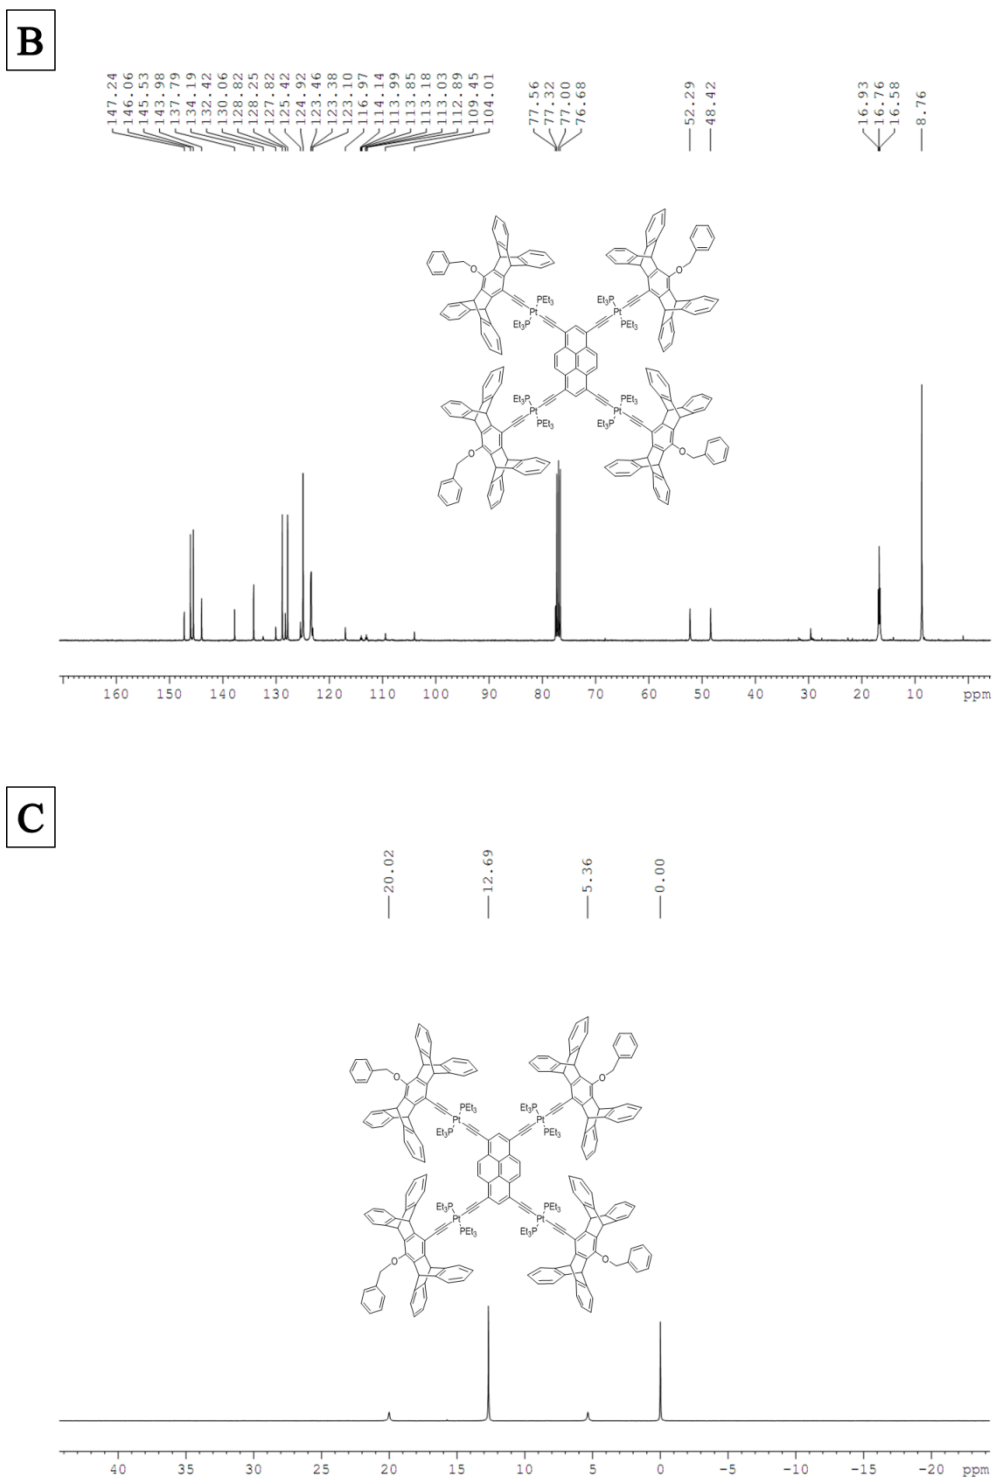

**Figure S5.**  $^1\text{H}$  (A),  $^{13}\text{C}$  (B) and  $^{31}\text{P}$ (C) NMR of compound **PP0** in  $\text{CDCl}_3$ .

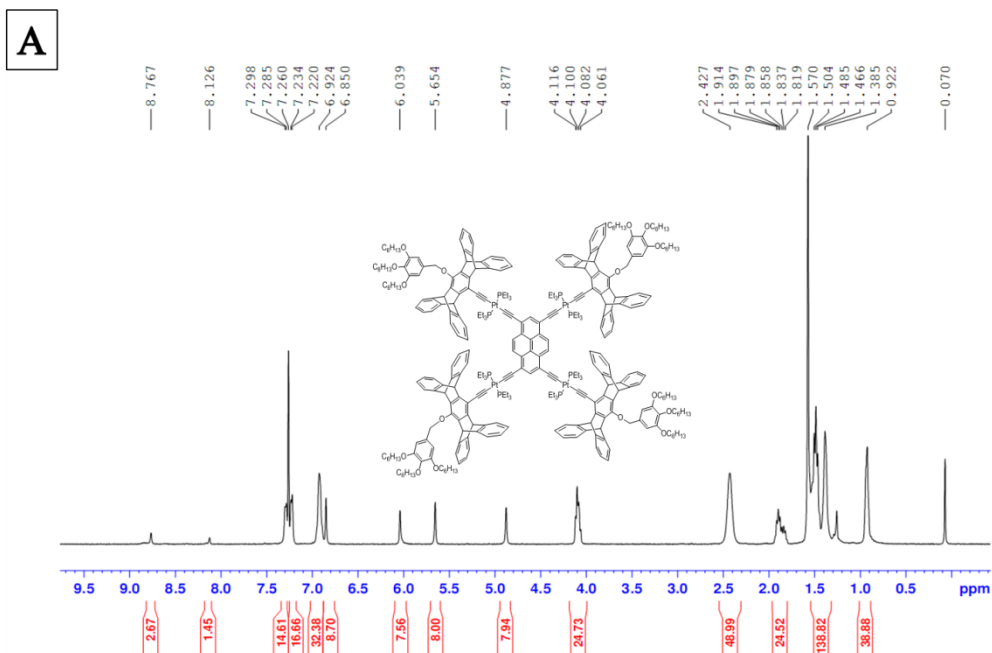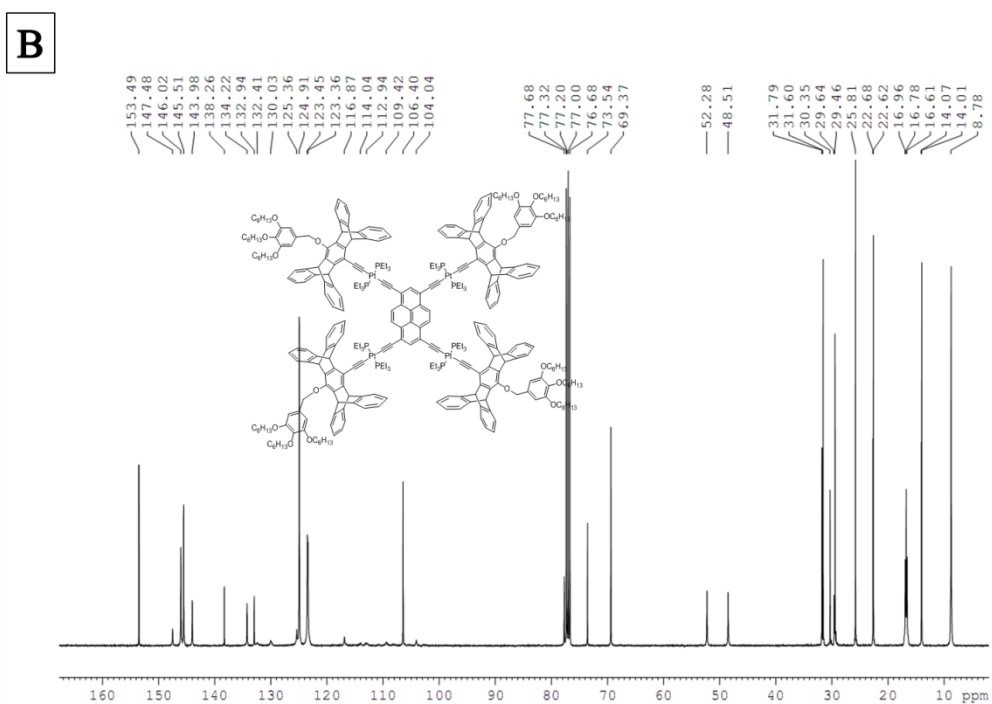

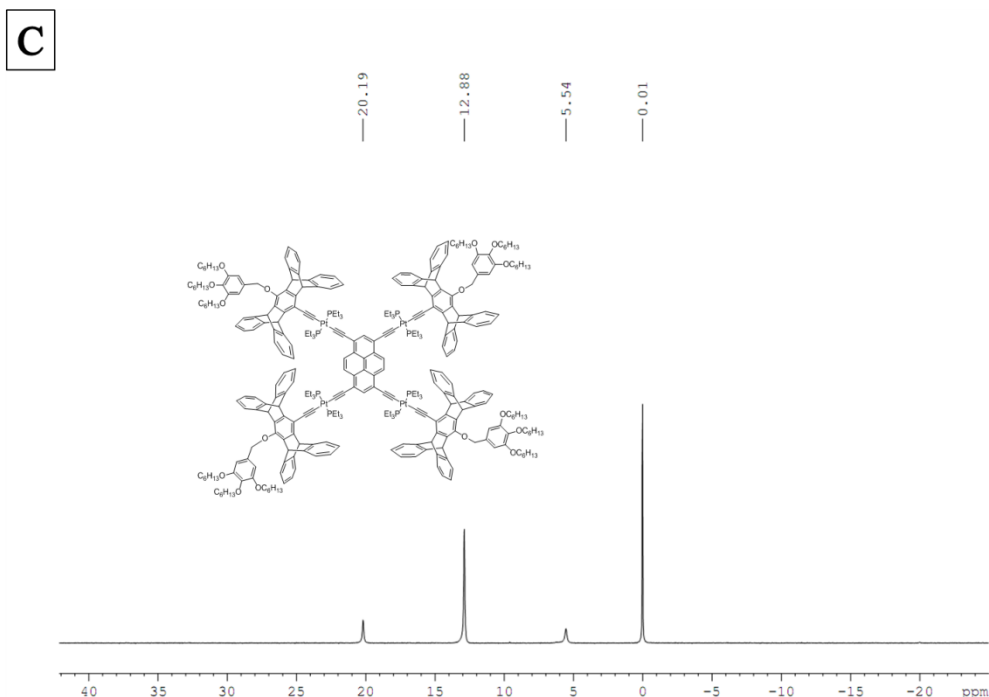

**Figure S6.**  $^1\text{H}$  (A),  $^{13}\text{C}$  (B) and  $^{31}\text{P}$  (C) NMR of compound **PP6** in  $\text{CDCl}_3$ .

### 3. MALDI-TOF-MS spectrometry of PT6 and PP0

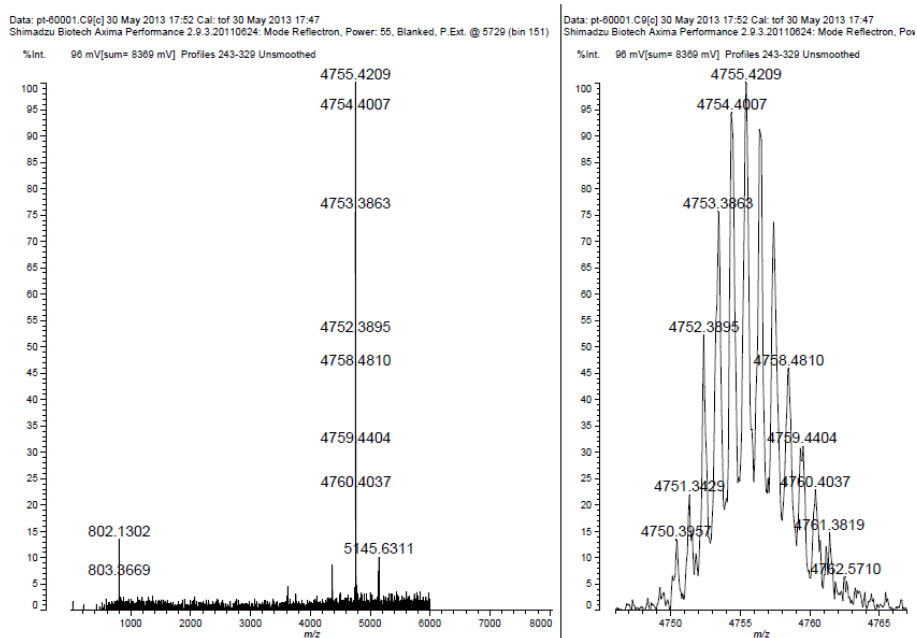

**Figure S7.** MALDI-TOF-MS spectrometry of **PT6**,  $m/z$  calcd for  $\text{C}_{260}\text{H}_{346}\text{O}_{16}\text{P}_8\text{Pt}_4$ , 4755.28 ( $\text{M}^+$ ), found 4755.42.

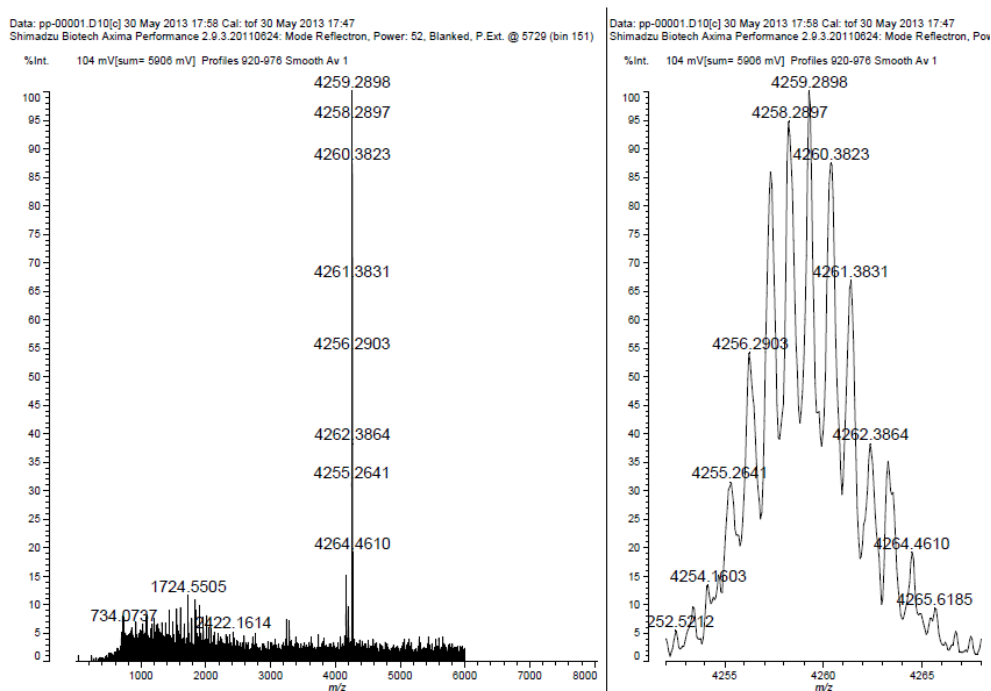

Figure S8. MALDI-TOF-MS spectrometry of PP0,  $m/z$  calcd for  $C_{244}H_{234}O_4P_8Pt_4$ , 4258.47 ( $M^+$ ), found 4258.29

#### 4. Solvent-variation absorption and emission spectra

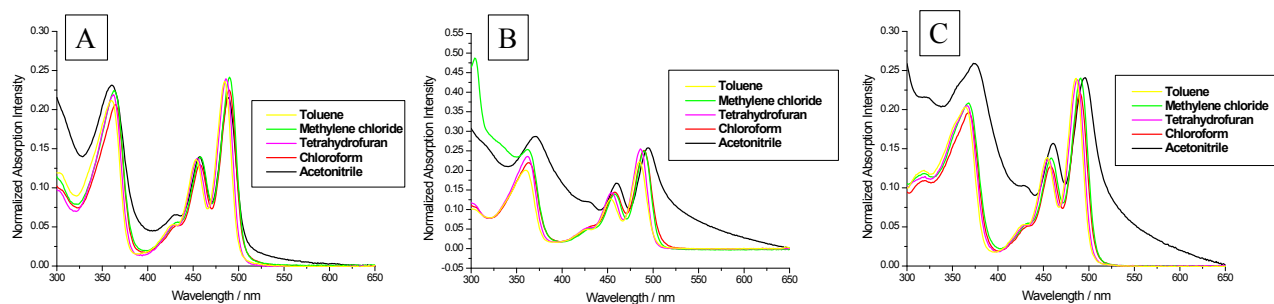

Figure S9. Solvent-variation absorption spectra of PP0 (A), PP6 (B), and PT6(C).

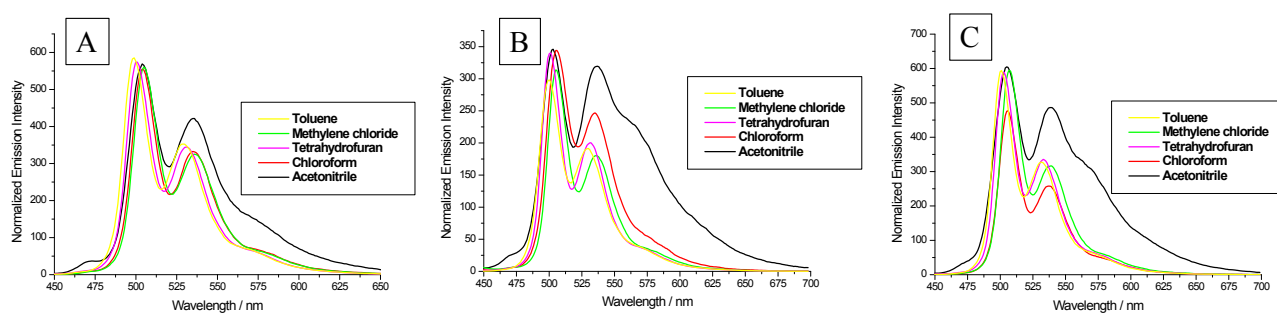

Figure S10. Solvent-variation emission spectra of PP0 (A), PP6 (B), and PT6(C).

## 5. Concentration-variation absorption and emission spectra

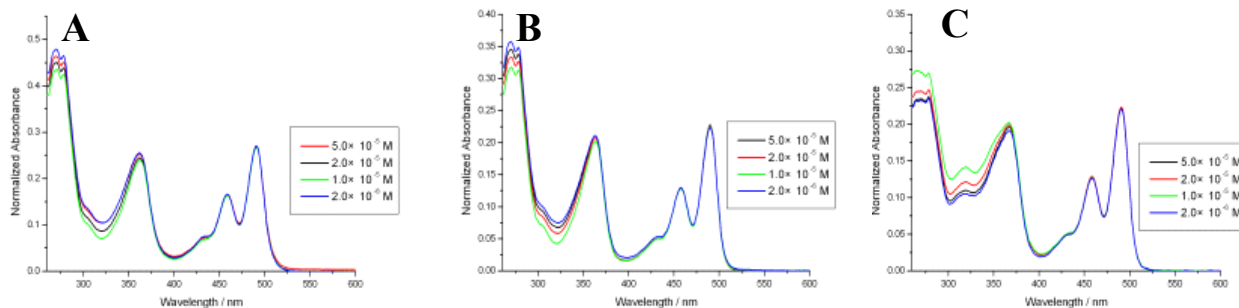

**Figure S11.** Absorption spectra of (A) PP6, (B) PP0, (C) PT6 in dichloromethane at different concentrations.

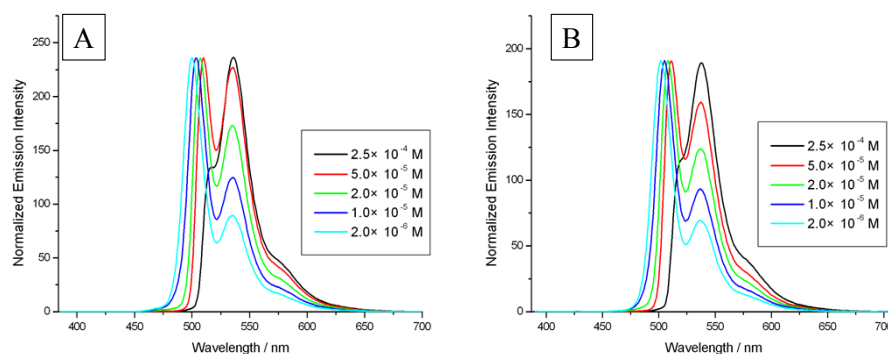

**Figure S12.** Emission spectra of (A) PP0 and (B) PT6 in dichloromethane at different concentrations.

## 6. LCSM images of the aggregates formed by PP0 and PT6

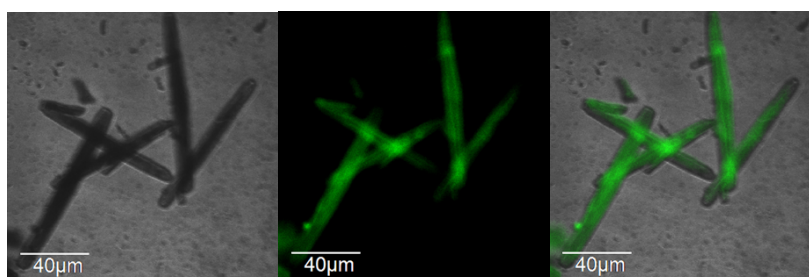

**Figure S13.** LCSM images of PP0 in toluene/*n*-propanol = 1/1 ( $\lambda_{exc}$ =362 nm, emission was collected at 450–690 nm).

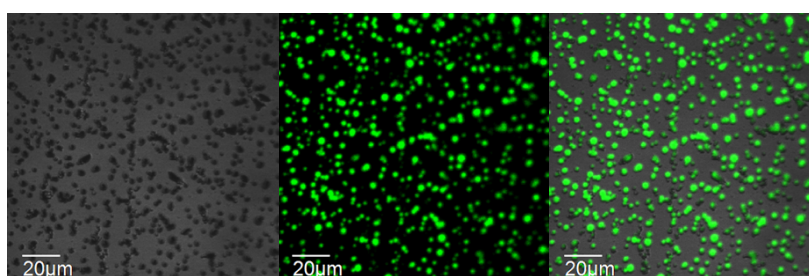

**Figure S14.** LCSM images of PT6 in toluene/*n*-propanol = 1/1 ( $\lambda_{exc}$ =362 nm, emission was collected at 450–690 nm).

## 7. Emission profiles of the aggregates

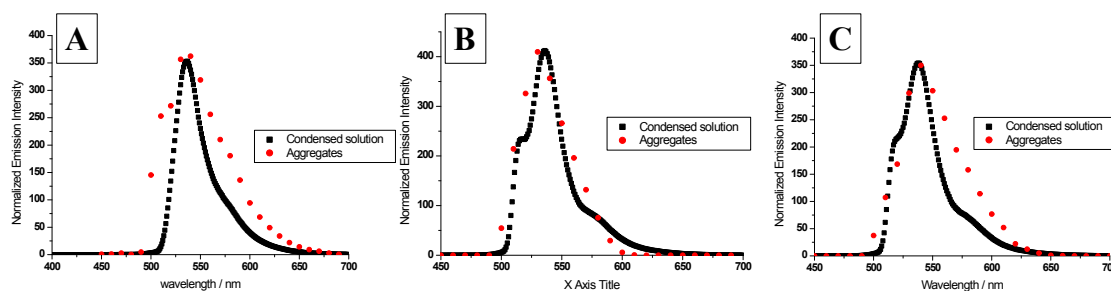

**Figure S15.** The emission spectra of the microstructures formed by **PP6**(A), **PP0**(B), **PT6**(C) and their emission spectra in condensed solution ( $c = 0.25$  mM in dichloromethane).  $\lambda_{\text{ex}} = 362$  nm.

## 8. EDX results of PP0 and PT6

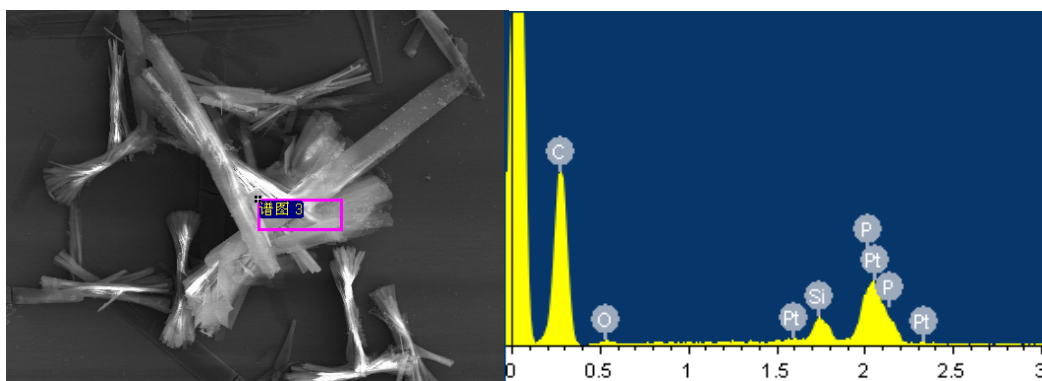

**Figure S16.** The EDX results of **PP0** were collected from the area marked by the pink boxes shown at the right side of the image.

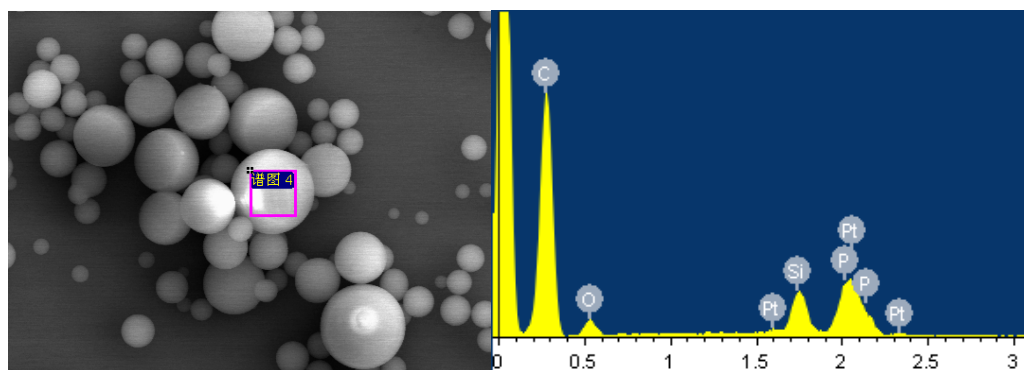

**Figure S17.** The EDX results of **PT6** were collected from the area marked by the pink boxes shown at the right side of the image.
